# Supplementary material for: Pim-2 kinase inhibits inflammation by suppressing the mTORC1 pathway in atherosclerosis
Source: publisher site journal article supplement (doi:10.18632/aging.203547), 2021-09-21
Supplement: Supplementary file [file aging-v13i18-203547-supplementary-material-SD1.pdf]

**SUPPLEMENTARY FIGURES**

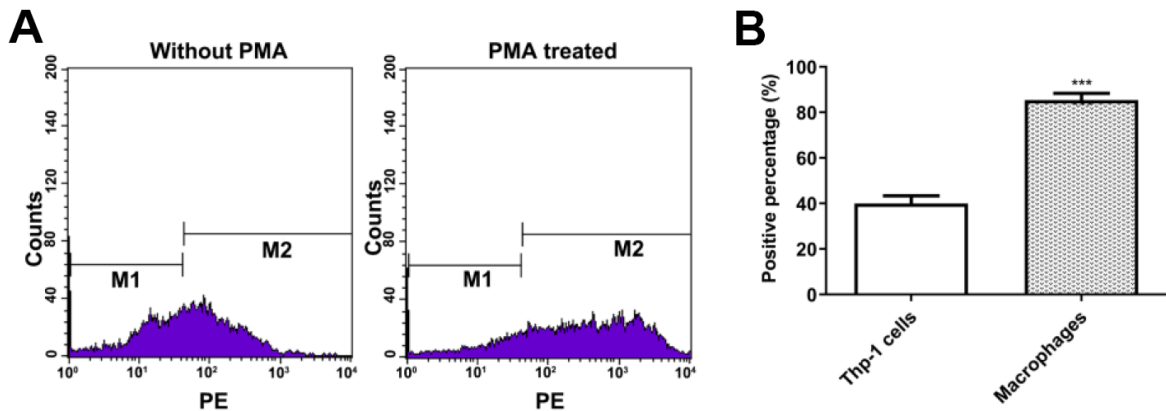

**Supplementary Figure 1. Analysis of CD11b plasma membrane expression by flow cytometry in THP-1-derived macrophages.** (A) Representative image of CD11b plasma membrane expression by flow cytometry in THP-1 cells or THP-1-derived macrophages. (B) Quantification analysis of CD11b plasma membrane expression (n=3 per group). Data are represented as the means ± SD of three independent experiments; \*\*\**P* < 0.001 versus THP-1 cells group.

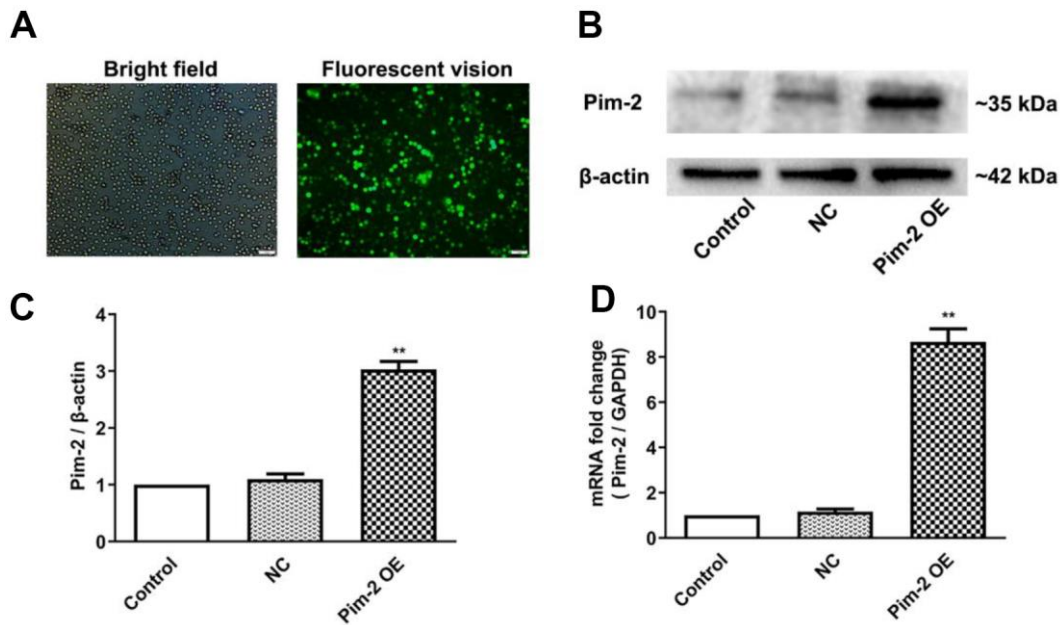

**Supplementary Figure 2. The efficiency of lentiviral transfection in THP-1 cells with Pim-2 OE.** (A) Representative image of lentiviral transfection in THP-1 cells with Pim-2 OE. (B) Representative western blot analysis of Pim-2 in THP-1 cells with Pim-2 OE. (C) Corresponding densitometric analysis of blots in (B, D) mRNA expression of Pim-2 by quantitative RT-PCR in THP-1 cells with Pim-2 OE; values normalized to the house-keeping gene, GAPDH. Data are represented as the means ± SD of three independent experiments; \*\**P* < 0.01 versus NC group.

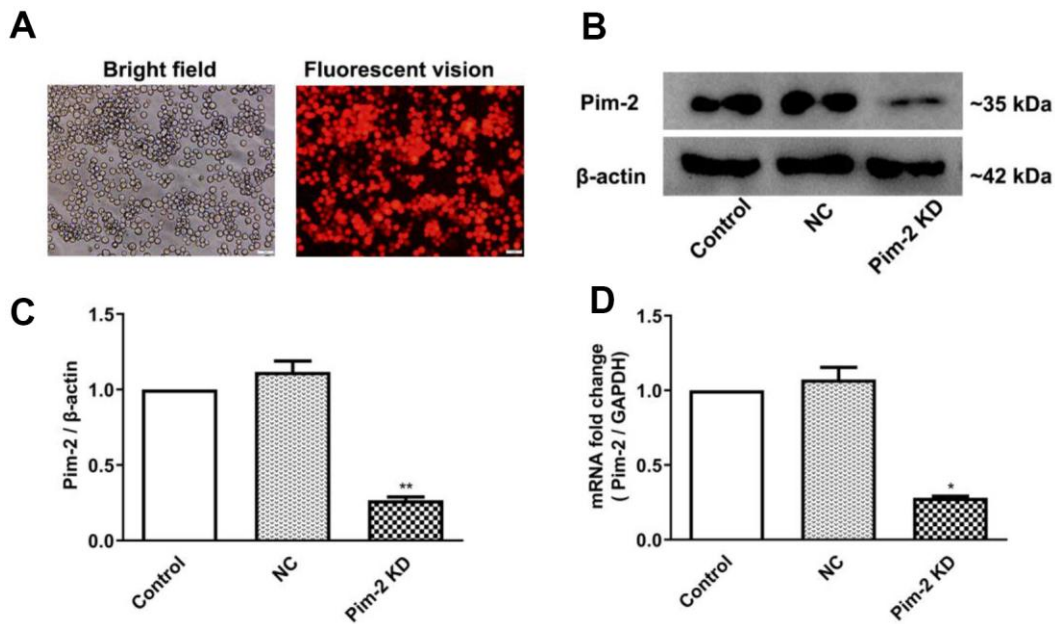

**Supplementary Figure 3. The efficiency of lentiviral transfection in THP-1 cells with Pim-2 KD0.** (A) Representative image of lentiviral transfection in THP-1 cells with Pim-2 KD. (B) Representative western blot analysis of Pim-2 in THP-1 cells with Pim-2 KD. (C) Corresponding densitometric analysis of blots in (B, D) mRNA expression of Pim-2 by quantitative RT-PCR in THP-1 cells with Pim-2 KD; values normalized to the house-keeping gene, GAPDH. Data are represented as the means  $\pm$  SD of three independent experiments; \* $P < 0.05$ , \*\* $P < 0.01$  versus NC group.

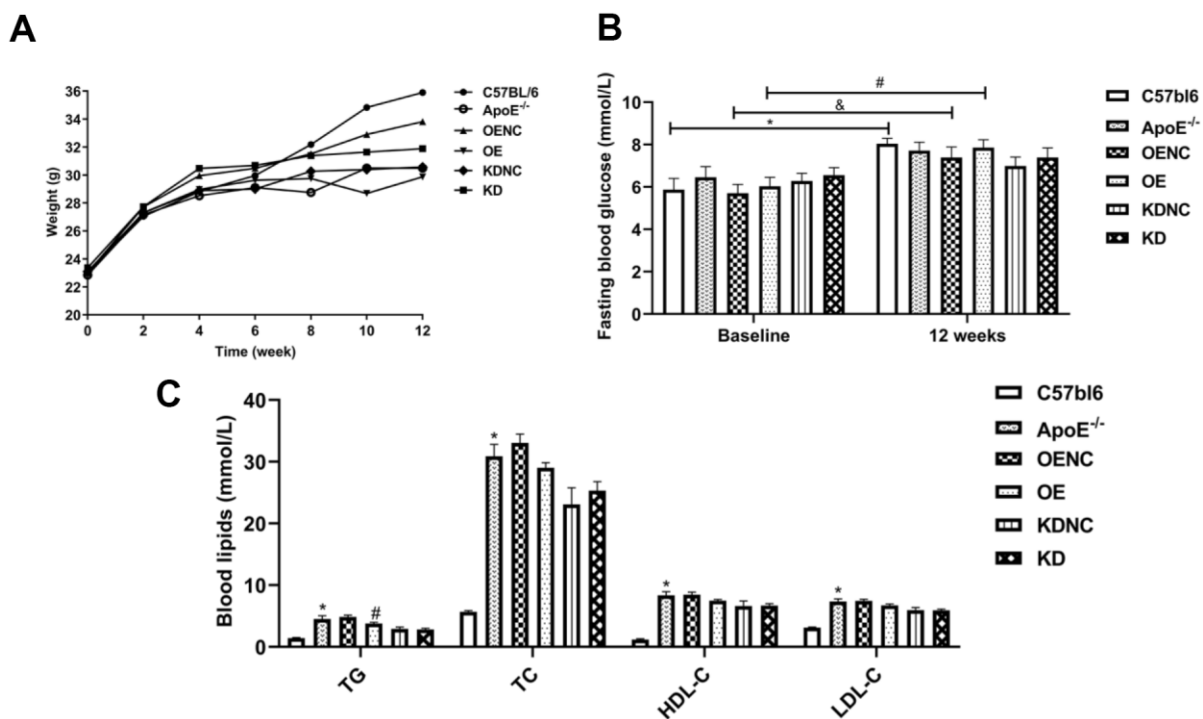

**Supplementary Figure 4. The body weight, fasting blood glucose and blood lipids of mice.** (A) Body weight (g) of mice was recorded at the indicated times (n=12 per group). (B) Fasting blood glucose (mmol/L) was determined at baseline and 20-week-old (n=10 per group); \* $P < 0.05$ , <sup>&</sup> $P < 0.05$ , <sup>#</sup> $P < 0.05$  versus the corresponding baseline levels of fasting blood glucose. (C) The levels of blood lipids at 20-week-old (n=10 per group); \* $P < 0.05$  versus C57bl6 group; <sup>#</sup> $P < 0.05$  versus OENC group.
